# Supplementary material for: C2 Agility for Emergency Management: Examining the Katrina and Sandy Responses
Source: publisher site journal article supplement (doi:10.1515/jhsem-2017-0046), 2018-10-11
Supplement: Supplementary file 1 [file jhsem-2017-0046_suppl.docx]

**Supplementary Material: Acronyms List
C2 Agility for Emergency Management: Examining the Katrina and Sandy Responses**

ACG Area Coordination Group

C2A Command and Control Agility

C2BD C2 by Design

CCRP Command and Control Research Program

COP Common Operating Picture

DCO Defense Coordinating Officer

DHS Department of Homeland Security

DOD Department of Defense

DOE Department of Energy

DSC Dual Status Commander

DSCA Defense Support to Civil Authority

EOC Emergency Operations Center

ESF Emergency Support Function

FCO Federal Coordinating Officer

FEMA Federal Emergency Management Agency

GAO General Accounting Office

ICS Incident Command System

IDA Institute for Defense Analyses

IMAT Incident Management Assistance Teams

JFO Joint Field Office

LNO Liaison Officer

LOE Lines of Effort

MERS Mobile Emergency Response Support

MEU Marine Expeditionary Unit

NATO North Atlantic Treaty Organization

NBEOC National Business Emergency Operations Center

NEC Network Enabled Capability

NIC National Integration Center

NIMS National Incident Management System

NOAA National Oceanographic and Aeronautic Agency

NORTHCOM U.S. Northern Command

NRCC National Response Coordination Center

NRF National Response Framework

NRP National Response Plan

RRCC Regional Response Coordination Center

SAR Search and Rescue

SAS Studies and Analysis Simulation

SOP Standard Operating Procedures

UCG Unified Command Group

U.S. United States

VOIP Voice Over Internet Protocol

VSAT Very Small Aperture Terminal
